# Supplementary material
Source: Royal Society of Chemistry journal article supplement (doi:10.1039/d5ce01076d)
Supplement: d5ce01076d1.pdf [file d5ce01076d1.pdf]

## Supporting Information

### Pushing the Limits of Oxygen Balance in Pentazolate Salts via the Theoretical Construction of Oxidizer-based Cocrystal

Zhenyu Yuan <sup>a</sup>, Chen Yang <sup>a\*</sup>, Lei Wang <sup>a</sup> Changlin Zhou <sup>a\*</sup>

<sup>a</sup> College of Materials and Chemical Engineering, Key Laboratory of Inorganic Nonmetallic Crystalline and Energy Conversion Materials, China Three Gorges University, China.

\* Corresponding authors. Email address: yangchen@ctgu.edu.cn (Chen Yang); clzhou@ctgu.edu.cn (Changlin Zhou)

|                                                                      |    |
|----------------------------------------------------------------------|----|
| Table of contents                                                    |    |
| SI 1. Reported <i>c</i> -N <sub>5</sub> <sup>-</sup> cocrystals..... | 2  |
| SI 2. Computational methods.....                                     | 3  |
| SI 3. Crystal structures.....                                        | 4  |
| SI 5. Structural stability.....                                      | 7  |
| SI 6. Heat of formation.....                                         | 8  |
| SI 7. Detonation performance.....                                    | 9  |
| SI 8. References.....                                                | 10 |

## SI 1. Reported $c$ - $N_5^-$ cocrystals.

**Table S1.** Selected parameters of reported  $c$ - $N_5^-$  cocrystals.

| Crystal                                                                                          | Space Group | Formula Unit | $d$ (g cm <sup>-3</sup> ) | OB%     | Ref  |
|--------------------------------------------------------------------------------------------------|-------------|--------------|---------------------------|---------|------|
| [NH <sub>4</sub> ][N <sub>5</sub> ]·1/2H <sub>2</sub> O (a)                                      | 14          | 4            | 1.509                     | -22.86% | [1]  |
| ([NH <sub>3</sub> OH][N <sub>5</sub> ]) <sub>2</sub> ·[NH <sub>3</sub> OH]Cl·H <sub>2</sub> O(b) | 14          | 4            | 1.588                     | -16.24% | [2]  |
| [HTATOT][N <sub>5</sub> ]·TATOT (c)                                                              | 14          | 4            | 1.664                     | -52.77% | [3]  |
| [NH <sub>4</sub> ][N <sub>5</sub> ]·1/6[NH <sub>4</sub> ]Cl (d)                                  | 227         | 2            | 1.438                     | -38.52% | [4]  |
| 2[N <sub>2</sub> H <sub>5</sub> ][N <sub>5</sub> ]·PDO (e)                                       | 2           | 1            | 1.608                     | -45.28% | [5]  |
| [HTATOT][N <sub>5</sub> ]·Ma (f)                                                                 | 15          | 8            | 1.743                     | -56.98% | [6]  |
| [HDNAZ][N <sub>5</sub> ]·DNAZ (g)                                                                | 56          | 4            | 1.679                     | -15.34% | [7]  |
| [NH <sub>3</sub> OH][N <sub>5</sub> ]/18C6 (h)                                                   | 19          | 4            | 1.292                     | -82.61% | [8]  |
| [TNHAHP][N <sub>5</sub> ]·[TNHAHP][NO <sub>3</sub> ](i)                                          | 61          | 8            | 1.687                     | -22.92% | [9]  |
| [NH <sub>4</sub> ][N <sub>5</sub> ]·DAF (j)                                                      | 19          | 4            | 1.569                     | -42.55% | [10] |
| [N <sub>2</sub> H <sub>5</sub> ][N <sub>5</sub> ]·DAF (k)                                        | 14          | 4            | 1.589                     | -43.35% | [10] |
| [NH <sub>3</sub> OH][N <sub>5</sub> ]·DAF (l)                                                    | 15          | 8            | 1.604                     | -31.37% | [10] |

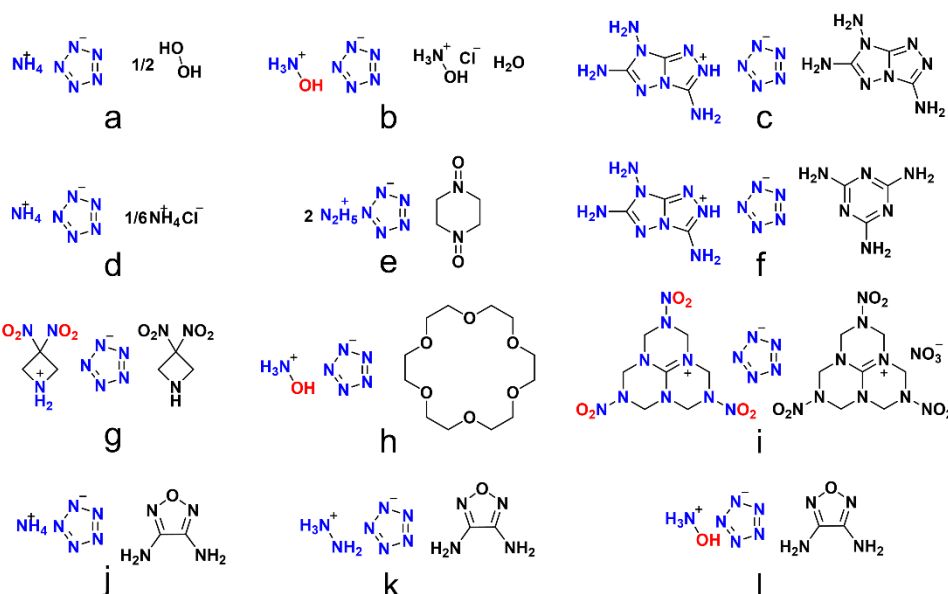

## SI 2. Computational methods

**Table S2.** The energy and force convergence criteria.

| Energy and force                 | maximum                                         |
|----------------------------------|-------------------------------------------------|
| geometry change                  | $3 \times 10^{-3}$ bohr                         |
| force component                  | $4.5 \times 10^{-4}$ hartree bohr <sup>-1</sup> |
| root-mean-square geometry change | $1.5 \times 10^{-3}$ bohr                       |
| root-mean-square force           | $3 \times 10^{-4}$ hartree bohr <sup>-1</sup>   |

**Table S3.** Comparison of calculated and experimental crystal parameters for selected *c*-N<sub>5</sub><sup>-</sup> cocrystals.

| Crystal                                                 |               | <i>a</i> | <i>b</i> | <i>c</i> | $\alpha$ | $\beta$ | $\gamma$ |
|---------------------------------------------------------|---------------|----------|----------|----------|----------|---------|----------|
|                                                         |               | (Å)      | (Å)      | (Å)      | (°)      | (°)     | (°)      |
| [NH <sub>4</sub> ][N <sub>5</sub> ]·1/2H <sub>2</sub> O | Experiment    | 3.84     | 13.19    | 9.19     | 90.00    | 96.73   | 90.00    |
|                                                         | Calculation   | 3.56     | 12.59    | 8.46     | 90.00    | 97.69   | 90.00    |
|                                                         | deviation (%) | 7.23     | 4.58     | -7.93    | 0.00     | 0.99    | 0.00     |
| 2[N <sub>2</sub> H <sub>5</sub> ][N <sub>5</sub> ]·PDO  | Experiment    | 6.18     | 7.36     | 7.25     | 108.08   | 91.51   | 114.82   |
|                                                         | Calculation   | 6.63     | 7.83     | 7.94     | 117.14   | 93.12   | 111.674  |
|                                                         | deviation (%) | 6.75     | 6.05     | 8.74     | 7.73     | 1.74    | 2.82     |
| [THZAP][N <sub>5</sub> ]·[THZAP][NO <sub>3</sub> ]      | Experiment    | 11.92    | 16.29    | 30.18    | 90.00    | 90.00   | 90.00    |
|                                                         | Calculation   | 11.19    | 15.77    | 28.61    | 90.00    | 90.00   | 90.00    |
|                                                         | deviation (%) | 6.08     | 3.16     | 5.20     | 0.00     | 0.00    | 0.00     |
| [NH <sub>4</sub> ][N <sub>5</sub> ]·DAF                 | Experiment    | 3.71     | 10.04    | 21.37    | 90.00    | 90.00   | 90.00    |

|               |      |      |       |       |       |       |
|---------------|------|------|-------|-------|-------|-------|
| Calculation   | 3.57 | 9.33 | 19.97 | 90.00 | 90.00 | 90.00 |
| deviation (%) | 3.92 | 7.11 | 6.56  | 0.00  | 0.00  | 0.00  |

**Table S4.** A comparison of the lattice parameters of  $2[\text{N}_2\text{H}_5][\text{N}_5]\cdot\text{PDO}$  obtained from simulation and experimental measurements.

|                        | $a$ (Å) | $b$ (Å) | $c$ (Å) | $d$ (g cm <sup>-3</sup> ) | $V$ (Å <sup>3</sup> ) |
|------------------------|---------|---------|---------|---------------------------|-----------------------|
| Experiment             | 6.630   | 7.834   | 7.945   | 1.608                     | 328.63                |
| Simulation             | 6.051   | 7.507   | 7.534   | 1.684                     | 313.87                |
| Relative deviation (%) | 3.95    | 3.82    | 5.51    | 4.73                      | 4.41                  |

### SI 3. Crystal structures

**Table S5** Relative energies for the ranked  $[\text{NH}_4][\text{N}_5]\cdot\text{ADN}$  structures.

| [NH <sub>4</sub> ][N <sub>5</sub> ] $\cdot$ ADN |            |              |             |              |             |              |
|-------------------------------------------------|------------|--------------|-------------|--------------|-------------|--------------|
| Space group                                     | PBE-D3(BJ) |              | PBE0-D3(BJ) |              | RPBE-D3(BJ) |              |
|                                                 | Rank       | $\Delta E^a$ | Rank        | $\Delta E^b$ | Rank        | $\Delta E^c$ |
| $P2_1/c, Z=4$                                   | 7          | 13.50        | 5           | 6.25         | 1           | 0            |
| $P2_1/c, Z=4$                                   | 1          | 0            | 1           | 0            | 2           | 15.08        |
| $P2_1/c, Z=4$                                   | 2          | 2.47         | 2           | 1.37         | 3           | 19.44        |
| $Pbca, Z=8$                                     | 3          | 5.96         | 4           | 4.06         | 4           | 39.61        |
| $Pna2_1, Z=4$                                   | 4          | 6.35         | 3           | 3.76         | 5           | 44.89        |
| $P2_1/c, Z=4$                                   | 6          | 10.84        | 7           | 10.43        | 6           | 56.23        |
| $P2_12_12_1, Z=4$                               | 5          | 9.64         | 6           | 7.52         | 7           | 69.61        |
| $P1, Z=4$                                       | 8          | 33.65        | 8           | 33.19        | 8           | 118.5        |

(a) PBE-D3(BJ), (b) PBE0-D3(BJ) and (c) RPBE-D3(BJ) functionals were employed with the TZV2P-MOLOPT-GTH basis set to calculate the total energies per asymmetric unit (in kJ/mol) relative to the most stable structure.

**Table S6** Relative energies for the ranked  $[\text{N}_2\text{H}_5][\text{N}_5]\cdot\text{HNF}$  structures.

| $[\text{N}_2\text{H}_5][\text{N}_5]\cdot\text{HNF}$                      |            |              |             |              |             |              |
|--------------------------------------------------------------------------|------------|--------------|-------------|--------------|-------------|--------------|
| Space group                                                              | PBE-D3(BJ) |              | PBE0-D3(BJ) |              | RPBE-D3(BJ) |              |
|                                                                          | Rank       | $\Delta E^a$ | Rank        | $\Delta E^b$ | Rank        | $\Delta E^c$ |
| <i>Pna2</i> <sub>1</sub> , Z=4                                           | 1          | 0            | 2           | 8.586        | 1           | 0            |
| <i>Pna2</i> <sub>1</sub> , Z=4                                           | 2          | 0.107        | 1           | 0            | 2           | 1.76         |
| <i>P2</i> <sub>1</sub> /c, Z=4                                           | 7          | 25.333       | 7           | 30.63        | 3           | 19.26        |
| <i>Pbca</i> , Z=8                                                        | 4          | 17.30        | 5           | 20.75        | 4           | 34.15        |
| <i>P2</i> <sub>1</sub> <i>2</i> <sub>1</sub> <i>2</i> <sub>1</sub> , Z=4 | 5          | 20.31        | 8           | 44.42        | 5           | 44.13        |
| <i>P1</i> , Z=4                                                          | 3          | 10.36        | 3           | 10.33        | 6           | 46.00        |
| <i>Pna2</i> <sub>1</sub> , Z=4                                           | 6          | 20.98        | 4           | 20.57        | 7           | 73.45        |
| <i>Pna2</i> <sub>1</sub> , Z=4                                           | 8          | 25.53        | 6           | 29.74        | 8           | 101.48       |

(a) PBE-D3(BJ), (b) PBE0-D3(BJ) and (c) RPBE-D3(BJ) functionals were employed with the TZV2P-MOLOPT-GTH basis set to calculate the total energies per asymmetric unit (in kJ/mol) relative to the most stable structure.

**Table S7.** A comparison of the lattice parameters of  $2[\text{N}_2\text{H}_5][\text{N}_5]\cdot\text{PDO}$  obtained from simulation and experimental measurements.

|                                        | <i>P1</i> | <i>P-1</i> |
|----------------------------------------|-----------|------------|
| Lattice energy (kJ mol <sup>-1</sup> ) | -416.612  | -425.427   |

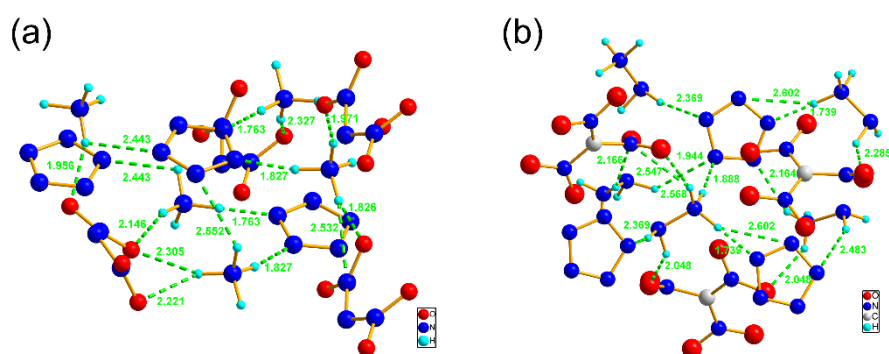

**Fig. S1** hydrogen-bond distributions (a)  $[\text{NH}_4][\text{N}_5]\cdot\text{ADN}$  and (b)  $[\text{N}_2\text{H}_5][\text{N}_5]\cdot\text{HNF}$ .

**Table S8** Hydrogen bonds for  $[\text{NH}_4][\text{N}_5]\cdot\text{ADN}$ .

| D-H...A      | D-H (Å) | H...A (Å) | D...A (Å) | D-H...A (°) |
|--------------|---------|-----------|-----------|-------------|
| N6-H6A...O4  | 1.04    | 2.15      | 3.1540    | 163         |
| N6-H6B...O3  | 1.04    | 1.96      | 2.9460    | 157         |
| N6-H6B...N4  | 1.04    | 2.45      | 2.9850    | 111         |
| N6-H6C...N5  | 1.04    | 2.58      | 3.0302    | 106         |
| N6-H6C...O4  | 1.04    | 2.33      | 3.2991    | 156         |
| N6-H6D...N1  | 1.07    | 1.72      | 2.7904    | 179         |
| N7-H7A...N3  | 1.04    | 2.53      | 3.0354    | 109         |
| N7-H7A...O1  | 1.04    | 1.97      | 2.9791    | 162         |
| N7-H7B...O2  | 1.05    | 1.83      | 2.8495    | 163         |
| N7-H7B...N10 | 1.05    | 2.51      | 3.5706    | 169         |
| N7-H7C...O2  | 1.03    | 2.22      | 2.9821    | 129         |
| N7-H7C...O4  | 1.03    | 2.30      | 3.290     | 159         |
| N7-H7C...N2  | 1.06    | 1.83      | 2.8890    | 171         |

**Table S9** Hydrogen bonds for  $[\text{N}_2\text{H}_5][\text{N}_5]\cdot\text{HNF}$ .

| D-H...A     | D-H (Å) | H...A (Å) | D...A (Å) | D-H...A (°) |
|-------------|---------|-----------|-----------|-------------|
| N1-H1A...N5 | 1.03    | 2.37      | 3.3828    | 168         |
| N1-H1B...O4 | 1.03    | 2.41      | 3.0217    | 117         |

|              |      |      |        |     |
|--------------|------|------|--------|-----|
| N1-H1B...O6  | 1.03 | 2.29 | 3.1209 | 137 |
| N2-H2A...N8  | 1.07 | 1.74 | 2.7959 | 170 |
| N2-H2A...N9  | 1.07 | 2.60 | 3.5524 | 148 |
| N2-H2B...O3  | 1.04 | 2.40 | 2.8145 | 103 |
| N2-H2B...O6  | 1.04 | 1.94 | 2.9256 | 157 |
| N2-H2B...N10 | 1.04 | 2.55 | 3.2915 | 128 |
| N2-H2C...N6  | 1.05 | 1.89 | 2.9230 | 169 |
| N3-H3A...N7  | 1.05 | 1.90 | 2.9421 | 171 |
| N3-H3B...N1  | 1.05 | 1.99 | 3.0038 | 160 |
| N3-H3B...O1  | 1.05 | 2.48 | 2.8728 | 101 |
| N3-H3B...O5  | 1.05 | 2.44 | 2.9443 | 108 |
| N3-H3C...O3  | 1.05 | 1.81 | 2.8099 | 159 |
| N3-H3C...N12 | 1.05 | 2.43 | 3.2490 | 134 |
| N4-H4A...N5  | 1.03 | 2.48 | 3.4164 | 151 |
| N4-H4B...N6  | 1.03 | 2.57 | 3.3825 | 136 |

### SI 5. Structural stability

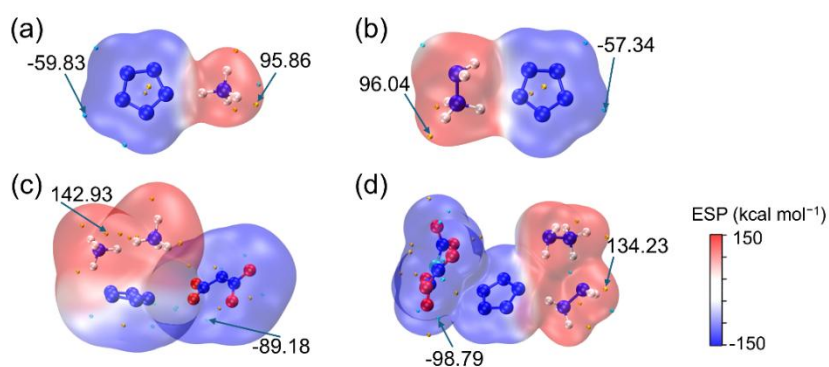

**Fig. S2** ESP-mapped surfaces of  $[\text{NH}_4][\text{N}_5]$  (a),  $[\text{N}_2\text{H}_5][\text{N}_5]$  (b),  $[\text{NH}_4][\text{N}_5]\cdot\text{ADN}$  (c) and  $[\text{N}_2\text{H}_5][\text{N}_5]\cdot\text{HNF}$  (d)

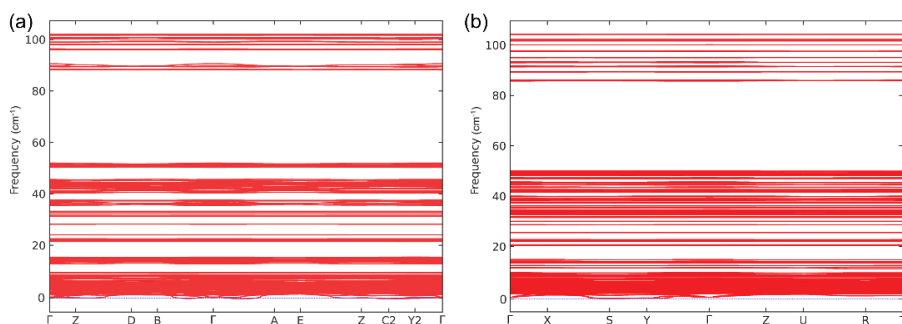

**Fig. S3** Phonon spectrum of  $[\text{NH}_4][\text{N}_5]\cdot\text{ADN}$  (a) and  $[\text{N}_2\text{H}_5][\text{N}_5]\cdot\text{HNF}$  (b)

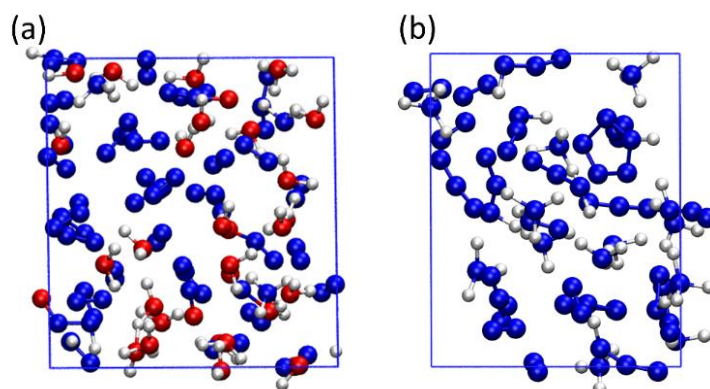

**Fig. S4** Simulation snapshots of (a)  $[\text{NH}_4][\text{N}_5]\cdot\text{ADN}$  and (b)  $[\text{NH}_4][\text{N}_5]$  at 1800 K after 25 ps.

**Table S10.** Number of major species from the decomposition of  $[\text{NH}_4][\text{N}_5]\cdot\text{ADN}$  and  $[\text{NH}_4][\text{N}_5]$  at 1800 K.

|                                            | $\text{N}_5$ | $\text{HN}_5$ | $\text{N}_2$ | $\text{HN}_3$ | $\text{N}_3^-$ | $\text{NH}_3$ | $\text{H}_2\text{O}$ | $\text{N}_2\text{O}$ |
|--------------------------------------------|--------------|---------------|--------------|---------------|----------------|---------------|----------------------|----------------------|
| $[\text{NH}_4][\text{N}_5]\cdot\text{ADN}$ | 0            | 0             | 27           | 1             | 0              | 1             | 15                   | 2                    |
| $[\text{NH}_4][\text{N}_5]$                | 1            | 2             | 8            | 6             | 2              | 5             | 0                    | 0                    |

## SI 6. Heat of formation.

The solid-state heat of formation (cocrystal  $\Delta H_f$ ) was calculated based on a Born–Haber energy cycle<sup>11</sup> with the following simplified equation for calculation:

$$\Delta H_f(\text{cocrystal}, 298\text{K}) = 2\Delta H_f(\text{cation}, 298\text{K}) + \Delta H_f(\text{anion 1}, 298\text{K}) + \Delta H_f(\text{anion 2}, 298\text{K}) - \Delta H_{\text{sub}}$$

The heat of sublimation can be estimated using the DFT method with the RPBE (revised Perdew Burke-Ernzerhof) exchange-correlation functional in CP2K program with the TZV2P-MOLOPT-GTH basis set.

**Table S11.** The related heat of formations for several species.

|                                                       | Heat of formation (kJ mol <sup>-1</sup> 298K) |
|-------------------------------------------------------|-----------------------------------------------|
| NH <sub>4</sub> cation <sup>a</sup>                   | 639.2                                         |
| DN anion <sup>b</sup>                                 | -156.2                                        |
| N <sub>2</sub> H <sub>5</sub> cation <sup>a</sup>     | 776.1                                         |
| NF anion <sup>c</sup>                                 | -228.8                                        |
| N <sub>5</sub> anion <sup>a</sup>                     | 258.7                                         |
| [NH <sub>4</sub> ][N <sub>5</sub> ]·ADN               | 644.2                                         |
| [N <sub>2</sub> H <sub>5</sub> ][N <sub>5</sub> ]·HNF | 860.1                                         |

<sup>a</sup> Ref 12. <sup>b</sup> Ref 13. <sup>c</sup> Ref 11.

### SI 7. Detonation performance

Detonation velocity ( $D$  in km s<sup>-1</sup>) and detonation pressure ( $P$  in GPa) were predicted by the empirical Kamlet–Jacobs<sup>14</sup> as follows:

$$D = 1.01 \left( N \bar{M}^{\frac{1}{2}} Q^{\frac{1}{2}} \right)^{\frac{1}{2}} (1 + 1.30\rho) \quad (3)$$

$$P = 1.558\rho^2 N \bar{M}^{\frac{1}{2}} Q^{\frac{1}{2}} \quad (4)$$

in which  $N$  (mol g<sup>-1</sup>) is the moles of detonation gases per gram explosive,  $M$  (g mol<sup>-1</sup>) represents the average molecular weight of these gases, and  $Q$  (cal g<sup>-1</sup>) is the heat of detonation.

**Table S12.** Formulas of  $N$ ,  $\bar{M}$ , and  $Q$  for C<sub>a</sub>H<sub>b</sub>O<sub>c</sub>N<sub>d</sub> Explosives

|           | $c \geq 2a + \frac{b}{2}$                     | $2a + \frac{b}{2} > c > \frac{b}{2}$             | $\frac{b}{2} > c$                    |
|-----------|-----------------------------------------------|--------------------------------------------------|--------------------------------------|
| $N$       | $\frac{b + c + 2d}{4M}$                       | $\frac{b + c + 2d}{4M}$                          | $\frac{b + d}{2M}$                   |
| $\bar{M}$ | $\frac{4M}{b + c + 2d}$                       | $\frac{56d + 88c - 8b}{b + 2c + 2d}$             | $\frac{2b + 28d + 32c}{b + d}$       |
| $Q$       | $\frac{28.9b + 94.05c + 0.239\Delta H_f}{4M}$ | $\frac{5.3875b + 47.025c + 0.239\Delta H_f}{4M}$ | $\frac{57.8c + 0.239\Delta H_f}{4M}$ |

## SI 8. References

1. J. Luo, H. Xia, W. Zhang, S. Song, Q. Zhang, *J. Mater. Chem. A*, 2020, **8**, 12334-12338.
2. Y. Yuan, T. Hou, D. Li, Y. Xu, M. Lu, *Chin. J. Energy Mater.*, 2022, **30**, 96-102.
3. C. Yang, L. Chen, W. Wu, C. Zhang, C. Sun, Y. Du, B. Hu, *ACS Appl. Energy Mater.*, 2021, **4**, 146-153.
4. Y. Xu, D. Li, P. Wang, Q. Lin, L. Ding, T. Hou, Y. Yuan, M. Lu, *J. Energetic Mater.*, 2023, **41**, 99-116.
5. J. Zhou, X. Li, T. Hou, Z. Xu, P. Wang, M. Lu, Y. Xu, *CrystEngComm*, 2023, **25**, 2027-2031.
6. Y. Xu, J. Zhou, X. Li, T. Hou, Z. Xu, P. Wang, M. Lu, *Commun. Mater.*, 2024, **5**, 25.
7. C. Yang, L. Chen, S. Chen, W. Wu, W. Yuan, J. Yao, C. Zhang, C. Sun, Y. Du, B. Hu, *Cryst. Growth Des.*, 2021, **21**, 4329-4336.
8. Chen, Z. Shen, D. Kong, C. Zhang, B. Hu, C. Gao, *CrystEngComm*, 2025, **27**, 5312-5318.
9. J. Zou, L. Zhang, Z. Chen, H. Li, Q. Zhou, X. Wang, M. Huang, S. Yu, H. Yang, *New J. Chem.*, 2025, **49**, 10922-10927
10. Chen, P. Gao, Z. Jin, Z. Shen, J. Sun, K. Deng, C. Zhu, B. Hu, C. Zhang, *Cryst. Growth Des.*, 2025, **25**, 6248-6257.
11. J. Zhang, Y. Feng, R. J. Staples, J. Zhang, J. M. Shreeve, *Nat. Commun.*, 2021, **12**, 2149.
12. K. O. Christe, D. A. Dixon, M. Vasiliu, R. Haiges, B. Hu, *Propellants, Explos., Pyrotech.*, 2019, **44**, 263-266.
13. H. Gao, C. Ye, C. M. Piekarski, J. M. Shreeve, *J. Phys. Chem. C*, 2007, **111**, 10718-10731.
14. J. Kamlet, S. J. Jacobs, *J. Chem. Phys.*, 1968, **48**, 23-35.
